# Supplementary material
Source: PubMed Central journal article supplement (PMC2000420)

a

|           |     |                                                                                            |     |
|-----------|-----|--------------------------------------------------------------------------------------------|-----|
| <b>A1</b> | 1   | ECVTQLLKDTCT <b>FE</b> GGDIT <b>TV</b> FTPSAKY <b>CQ</b> VV <b>CT</b> YHPR <b>CL</b> LFTFT | 44  |
| <b>A2</b> | 92  | ACNKDIYVDLL <b>MK</b> GINYN <b>SS</b> VAKSAQE <b>CQ</b> ER <b>CT</b> DDVH <b>CH</b> FFTYA  | 135 |
| <b>A3</b> | 181 | ACIRDI FPNTV <b>FA</b> DSNID <b>SV</b> MAPDAFV <b>CG</b> RI <b>CT</b> HHPG <b>CL</b> FFTF  | 224 |
| <b>A4</b> | 272 | FCHSSFYHDTD <b>FL</b> GEELD <b>IV</b> AAKSHEA <b>CQ</b> KL <b>CT</b> NAVR <b>CQ</b> FFTYT  | 315 |

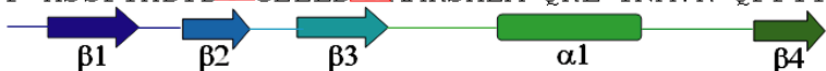

|           |  |                                                                                                                       |     |
|-----------|--|-----------------------------------------------------------------------------------------------------------------------|-----|
| <b>A1</b> |  | AES <b>P</b> SED <b>P</b> TRWFT <b>C</b> VLKDSVTETLPR <b>VM</b> R-TAAISGYSFK <b>C</b> SHQIS                           | 91  |
| <b>A2</b> |  | TRQ <b>F</b> PSLEHRNI <b>C</b> LLKHTQTGTPT <b>IT</b> KLDKVVS <b>G</b> FS <b>L</b> KS <b>C</b> ALS <b>N</b> L          | 180 |
| <b>A3</b> |  | SQEW <b>P</b> KESQRNI <b>C</b> LLK <b>T</b> SESGLPST <b>RI</b> KKSKALSG <b>F</b> SLQ <b>S</b> CRHSIPV                 | 271 |
| <b>A4</b> |  | PAQAS <b>C</b> NE <b>G</b> K <b>G</b> K <b>C</b> YLKLS <b>S</b> NGSP <b>T</b> KL <b>H</b> GRGGISGYTLRL <b>C</b> KMDNE | 361 |

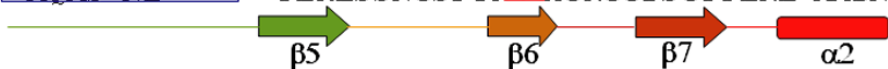

b

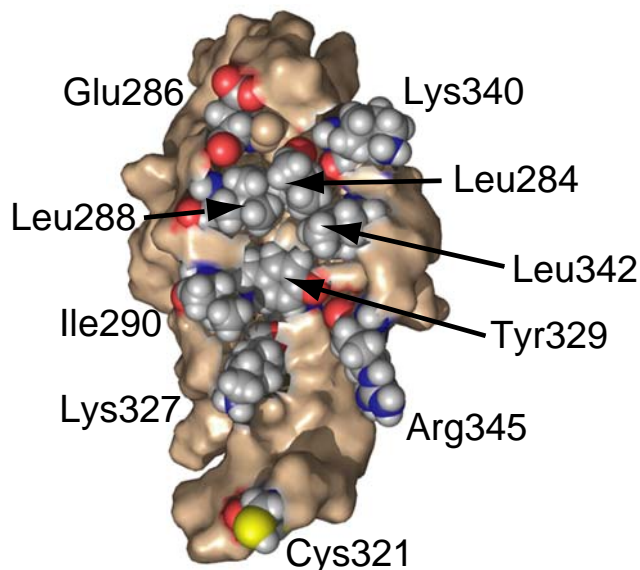

Supplement: pnas_0703080104_2.pdf [file pnas_0703080104_2.pdf]
