# Supplementary material
Source: PubMed Central journal article supplement (PMC2000420)
Supplement: pnas_0703080104_4.pdf [file pnas_0703080104_4.pdf]

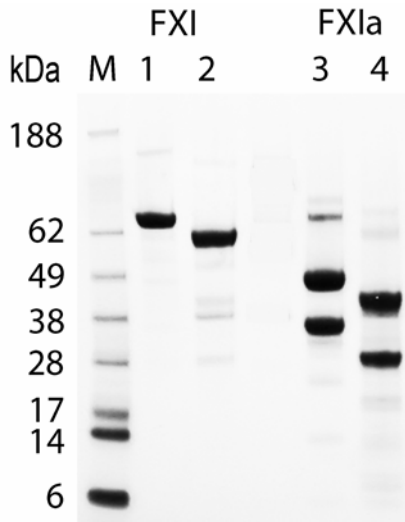

Endo glycosidase (PNGase F) treatment of Factor XI and XIa.  
The completion of deglycosylation is confirmed by SDS-PAGE analysis.  
Lanes: M - Markers; 1 - FXI; 2 - deglycosylated FXI  
3 - FXIa; 4 - deglycosylated FXIa
