# Supplementary material
Source: PubMed Central journal article supplement (PMC2000420)
Supplement: pnas_0703080104_6.pdf [file pnas_0703080104_6.pdf]

**Table 1. NMR and refinement statistics for the homodimeric A4 domain of factor XI**

---

|                                                                       |               |
|-----------------------------------------------------------------------|---------------|
| <b>Intramonomer restraints</b>                                        |               |
| Total NOE distance constraints                                        | 1,339         |
| Intraresidue                                                          | 403           |
| Sequential ( $ i-j  = 1$ )                                            | 407           |
| Medium-range ( $ i-j  < 4$ )                                          | 121           |
| Long-range ( $ i-j  > 5$ )                                            | 316           |
| Hydrogen bonds                                                        | 61            |
| Total dihedral angle restraints ( $\Psi$ & $\Phi$ )                   | 112           |
| Total RDC                                                             | 70            |
| <b>Intermonomer NOE restraints</b>                                    | 48            |
| <b>Order parameter from RDC analysis (using PALES)</b>                |               |
| Da=-7.2095; R=0.245                                                   |               |
| $S_{xx}=2.1145e^{-04}$ $S_{yy}=4.5655e^{-04}$ $S_{zz}=-6.6800e^{-04}$ |               |
| <b>Structure Statistics of 14 converging structures</b>               |               |
| Deviations from idealized geometry                                    |               |
| Bond lengths, Å                                                       | 0.0032±0.0003 |
| Bond angles, °                                                        | 0.70±0.12     |
| Impropers, °                                                          | 0.93±0.1      |
| Average pairwise rmsd, Å                                              |               |
| Heavy atoms (well defined region)                                     | 1.95 (1.045)  |
| Backbone (well defined region)                                        | 1.43 (0.8471) |
| <b>Ramachandran plot</b>                                              |               |
| Most favored region, %                                                | 57.7          |
| Additionally allowed region, %                                        | 32.1          |
| Generously allowed region, %                                          | 6.4           |
| Disallowed region, %                                                  | 3.8           |

---
