# Supplementary material
Source: PubMed Central journal article supplement (PMC2000420)
Supplement: pnas_0703080104_7.pdf [file pnas_0703080104_7.pdf]

**Table 2. Residue pairs showing NOE connectivities consistent with alternative conformations of the mobile loop (residues 316-325) of the FXI A4 domain**

| NOEs consistent with extended loop |    |      |    | NOEs inconsistent with extended loop |    |      |    |
|------------------------------------|----|------|----|--------------------------------------|----|------|----|
| T315                               | HN | C328 | HA | I290                                 | HG | C321 | HB |
| K327                               | HN | T315 | HB | Y314                                 | HN | C321 | HA |
| K327                               | HG | T315 | HB | A319                                 | HA | Y314 | HA |
| K327                               | HN | T315 | HN | C321                                 | HN | Y314 | HA |
| C328                               | HB | A293 | HB | C321                                 | HN | C328 | HA |
| G347                               | HN | T315 | HB | N322                                 | HA | T315 | HB |
| T315                               | HN | K327 | HN | E323                                 | HG | Q318 | HG |
| T315                               | HN | K327 | HB | G324                                 | HN | Q318 | HA |
| T315                               | HB | K327 | HB | K325                                 | HN | Q318 | HA |
|                                    |    |      |    | K327                                 | HB | A319 | HB |
|                                    |    |      |    | K327                                 | HG | S320 | HB |
