# Supplementary material
Source: PubMed Central journal article supplement (PMC2000420)

*a*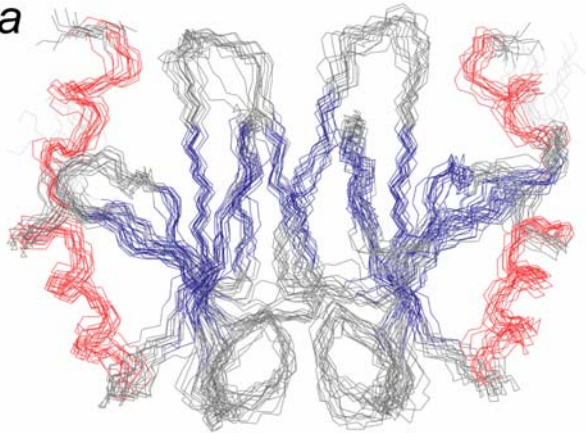*b*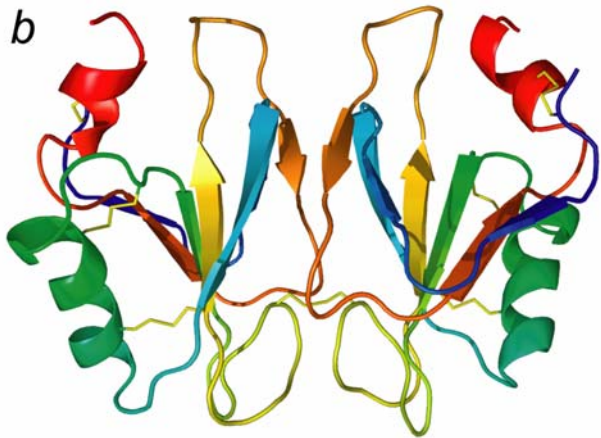

Supplement: pnas_0703080104_1.pdf [file pnas_0703080104_1.pdf]

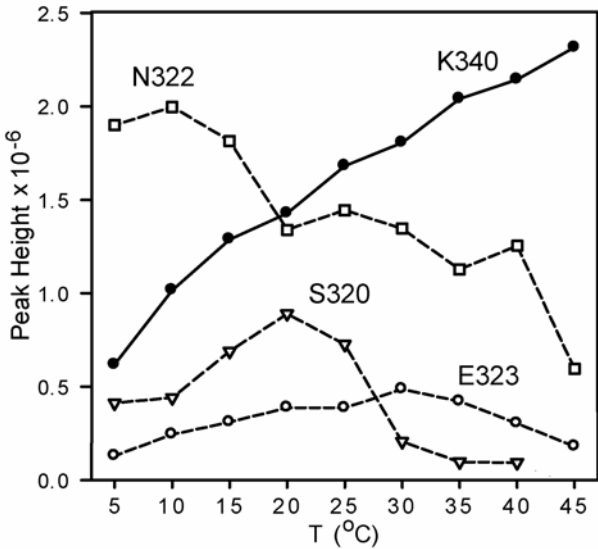

Supplement: pnas_0703080104_3.pdf [file pnas_0703080104_3.pdf]

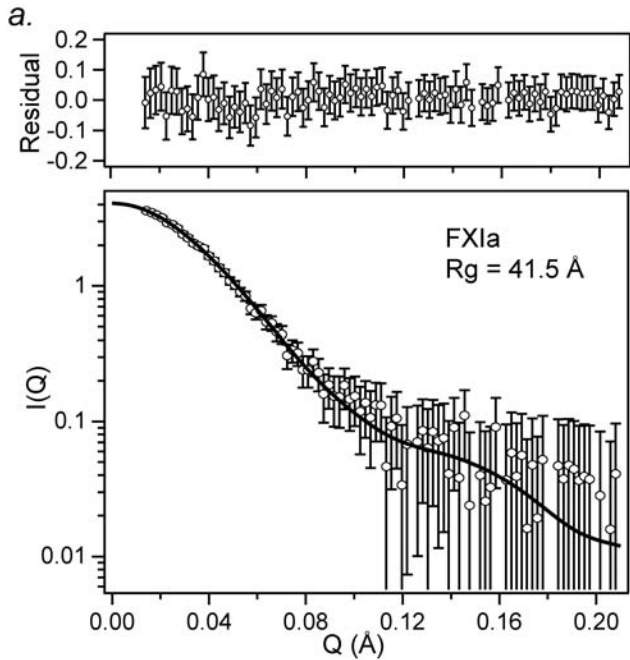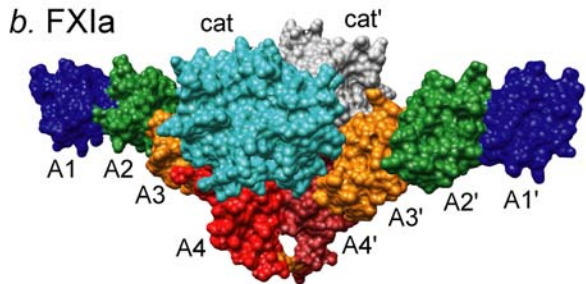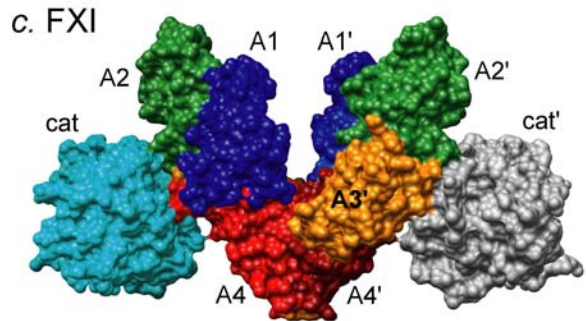

Supplement: pnas_0703080104_5.pdf [file pnas_0703080104_5.pdf]
